# Supplementary material for: A Case for Psychiatric Leadership in Dispositional Capacity Assessment
Source: Atypon-hosted journal article supplement (doi:10.1176/appi.ps.202100247), 2021-09-24
Supplement: appi.ps.202100247.ds001.pdf [file appi.ps.202100247.ds001.pdf]

**Recommended practical clinical pathway for dispositional capacity assessments.**

|                                                                                                                             |
|-----------------------------------------------------------------------------------------------------------------------------|
| 1) Psychiatric evaluation and decisional capacity assessment by psychiatrist.                                               |
| 2) Formal cognitive testing (ex. MoCA) by psychiatrist.                                                                     |
| 3) Obtaining of collateral by social worker, psychiatrist, and/or primary team member.                                      |
| 4) Assessment of Activities of Daily Living (ex. Langley-Porter Physical Self-Maintenance Scale) by occupational therapist. |
| 5) Mobility assessment, if indicated, by physical therapist.                                                                |
| 6) Care team convention to discuss most appropriate disposition given the above data.                                       |
| 7) Dispositional capacity assessment documented by psychiatrist.                                                            |
| 8) Final dispositional decision made by primary team physician (if different from assessing psychiatrist).                  |
| 9) Arrangement of aftercare by social worker.                                                                               |
